# Supplementary material for: Synchronously enhancing thermal conductivity and dielectric properties in epoxy composites via incorporation of functionalized boron nitride
Source: Royal Society of Chemistry journal article supplement (doi:10.1039/d4dt00979g), 2024-01-01
Supplement: d4dt00979g1.pdf [file d4dt00979g1.pdf]

## **Supplementary Information**

### **Synchronously Enhancing Thermal Conductivity and Dielectric Properties in Epoxy Composites *Via* Incorporation of Functionalized Boron Nitride**

Taeyoon Lim<sup>a</sup>, Jeseung Yoo<sup>a</sup>, Hyuk Park<sup>a</sup>, Sabah Ansar<sup>b</sup>, Iqra Rabani<sup>a\*</sup>, and Young-Soo Seo<sup>a\*</sup>,

<sup>a</sup>Department of Nanotechnology and Advanced Materials Engineering, Sejong University, Seoul- 05006, Republic of Korea

<sup>b</sup>Department of Clinical Laboratory Sciences, College of Applied Medical Sciences, King Saud University, P.O. Box 10219, Riyadh, 11433, Saudi Arabia

**Equal Correspondence email: [iqra.rabani@sejong.ac.kr](mailto:iqra.rabani@sejong.ac.kr) & [ysseo@sejong.ac.kr](mailto:ysseo@sejong.ac.kr)**

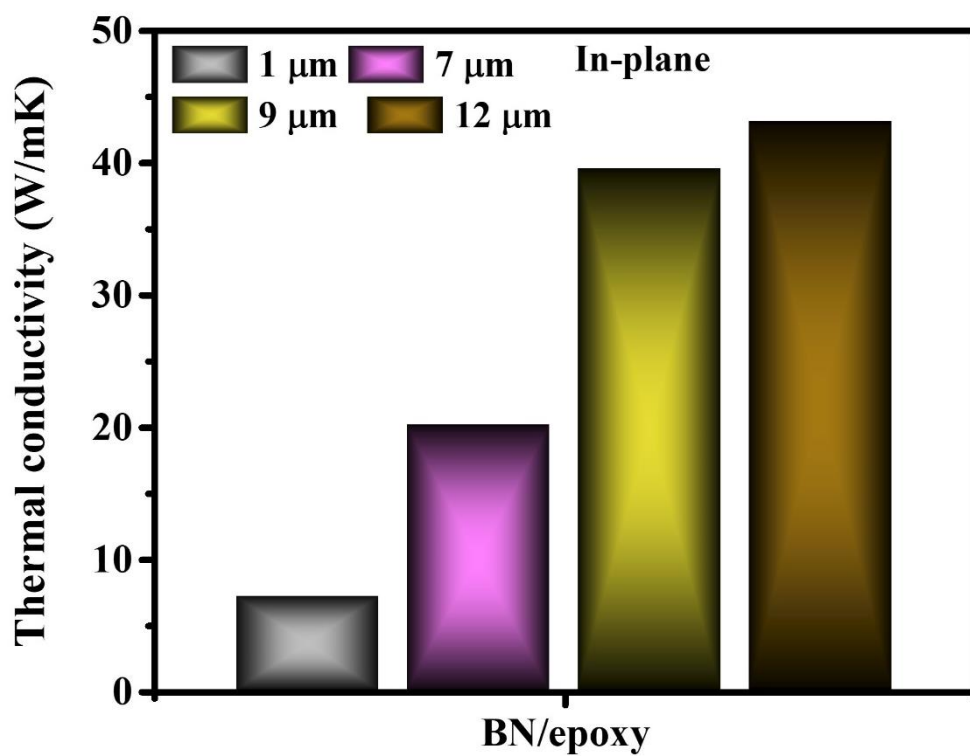

**Figure S1.** Thermal conductivity of BN/epoxy composite using various size of fillers (h-BN) such as 1, 7, 9 and 12 μm.

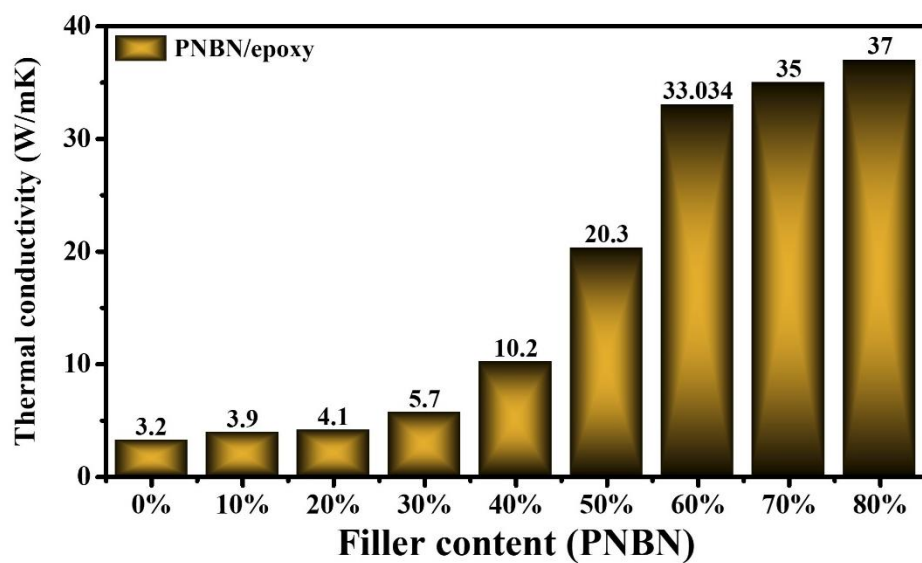

**Figure S2.** Thermal conductivity of PNB/epoxy composite at various filler loading content.

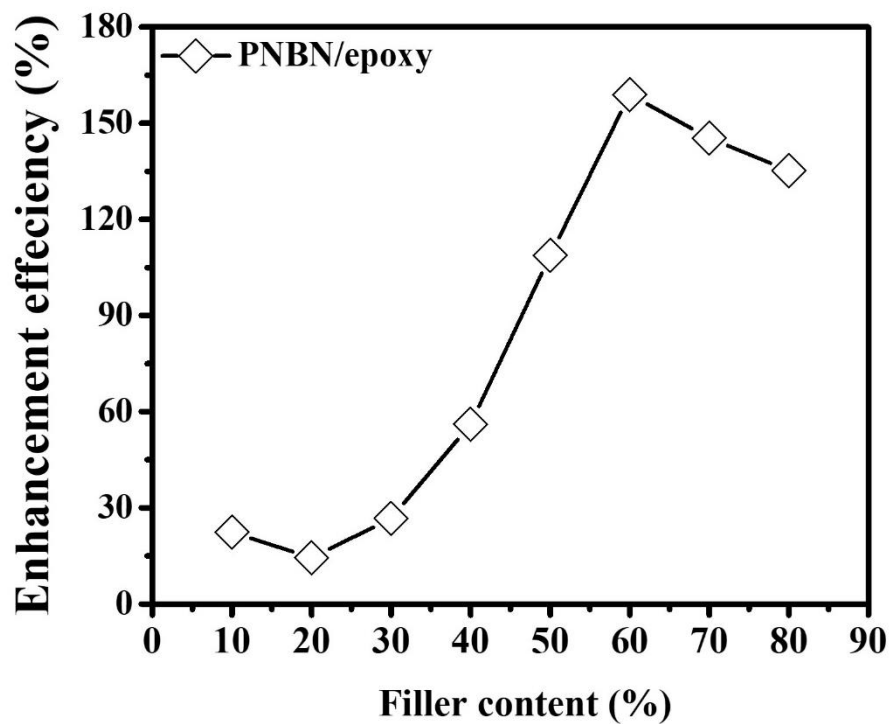

**Figure S3.** Enhancement efficiency (%) of PNBN/epoxy composite at various filler loading content.

**Table 1:** Summary of the performance of thermal conductivity (T.C.) with respect to filler loading content employing the BN/epoxy based composites and their comparison with the previously published literature.

| <b>Materials</b>     | <b>Filler loading (%)</b> | <b>T.C. (W/mK)</b> | <b>Test Method</b> | <b>Ref.</b>         |
|----------------------|---------------------------|--------------------|--------------------|---------------------|
| <b>DNBN/epoxy</b>    | <b>60</b>                 | <b>47</b>          | <b>Laser flash</b> | <b>Present work</b> |
| <b>PBNB/epoxy</b>    | <b>60</b>                 | <b>39</b>          | <b>Laser flash</b> |                     |
| <b>BN/epoxy</b>      | <b>60</b>                 | <b>33</b>          | <b>Laser flash</b> |                     |
| <b>EP/BN</b>         | 36                        | 1.05               | TPS                | [1]                 |
| <b>EP/BN-ODA</b>     | 3                         | 0.329              | Laser flash        | [2]                 |
| <b>EP/BN-HBP</b>     | 6                         | 0.246              | Laser flash        | [3]                 |
| <b>EP/3D-BNNS</b>    | 9.3                       | 2.85               | Laser flash        | [4]                 |
| <b>EP/3D-C-BNNS</b>  | 9.6                       | 3.13               | Laser flash        | [5]                 |
| <b>EP/aligned BN</b> | 44                        | 9                  | Laser flash        | [6]                 |
| <b>EP/aligned BN</b> | 40                        | 5.2                | Laser flash        | [7]                 |
| <b>EP/BN/Ag NPs</b>  | 25                        | 3.06               | Laser flash        | [8]                 |
| <b>EP/BN</b>         | 17.5                      | 0.91               | Laser flash        | [9]                 |
| <b>EP/BNNS</b>       | 12                        | 0.387              | Laser flash        | [10]                |
| <b>EP/BN</b>         | 18                        | 1.037              | Hot wire           | [11]                |
| <b>EP/h-BN-PGMA</b>  | 15                        | 1.198              | Hot wire           | [12]                |

## Reference

- [1] J. Gu, Q. Zhang, J. Dang, C. Xie, Thermal conductivity epoxy resin composites filled with boron nitride, *Polymers for Advanced Technologies*, 23 (2012) 1025-1028.
- [2] J. Yu, X. Huang, C. Wu, X. Wu, G. Wang, P. Jiang, Interfacial modification of boron nitride nanoplatelets for epoxy composites with improved thermal properties, *Polymer*, 53 (2012) 471-480.
- [3] L. Fang, C. Wu, R. Qian, L. Xie, K. Yang, P. Jiang, Nano–micro structure of functionalized boron nitride and aluminum oxide for epoxy composites with enhanced thermal conductivity and breakdown strength, *Rsc Advances*, 4 (2014) 21010-21017.
- [4] X. Zeng, Y. Yao, Z. Gong, F. Wang, R. Sun, J. Xu, C.P. Wong, Ice-templated assembly strategy to construct 3D boron nitride nanosheet networks in polymer composites for thermal conductivity improvement, *Small*, 11 (2015) 6205-6213.
- [5] J. Chen, X. Huang, Y. Zhu, P. Jiang, Cellulose nanofiber supported 3D interconnected BN nanosheets for epoxy nanocomposites with ultrahigh thermal management capability, *Advanced Functional Materials*, 27 (2017) 1604754.
- [6] C. Yu, J. Zhang, Z. Li, W. Tian, L. Wang, J. Luo, Q. Li, X. Fan, Y. Yao, Enhanced through-plane thermal conductivity of boron nitride/epoxy

- composites, *Composites Part A: Applied Science and Manufacturing*, 98 (2017) 25-31.
- [7] K. Kim, H. Ju, J. Kim, Vertical particle alignment of boron nitride and silicon carbide binary filler system for thermal conductivity enhancement, *Composites Science and Technology*, 123 (2016) 99-105.
- [8] F. Wang, X. Zeng, Y. Yao, R. Sun, J. Xu, C.-P. Wong, Silver nanoparticle-deposited boron nitride nanosheets as fillers for polymeric composites with high thermal conductivity, *Scientific reports*, 6 (2016) 19394.
- [9] W.S. Lee, J. Yu, Comparative study of thermally conductive fillers in underfill for the electronic components, *Diamond and related Materials*, 14 (2005) 1647-1653.
- [10] Z. Lin, A. Mcnamara, Y. Liu, K.-s. Moon, C.-P. Wong, Exfoliated hexagonal boron nitride-based polymer nanocomposite with enhanced thermal conductivity for electronic encapsulation, *Composites Science and Technology*, 90 (2014) 123-128.
- [11] J. Hou, G. Li, N. Yang, L. Qin, M.E. Grami, Q. Zhang, N. Wang, X. Qu, Preparation and characterization of surface modified boron nitride epoxy composites with enhanced thermal conductivity, *Rsc Advances*, 4 (2014) 44282-44290.
- [12] Y. Jiang, X. Shi, Y. Feng, S. Li, X. Zhou, X. Xie, Enhanced thermal conductivity and ideal dielectric properties of epoxy composites containing polymer

modified hexagonal boron nitride, *Composites Part A: Applied Science and Manufacturing*, 107 (2018) 657-664.
